# Supplementary material for: University Lecturers and Students Could Help in Community Education About SARS-CoV-2 Infection in Uganda
Source: PubMed Central journal article supplement — Health Serv Insights. 2020 Jul 24;13:1178632920944167. doi: 10.1177/1178632920944167 (PMC7383606; doi:10.1177/1178632920944167), 2020-07-24
Supplement: Supplement_File.pdf [file Supplement_File.pdf]

1 Supplement File 1: The questionnaire

2

|                                                                                          |             |           |  |
|------------------------------------------------------------------------------------------|-------------|-----------|--|
| <b>Sex (Tick):</b> Male Female                                                           | <b>Age:</b> |           |  |
| <b>Occupation (Tick):</b> Student Lecturer                                               |             |           |  |
| <b>Hazard knowledge: Which of the following is a sign or symptom of COVID-19?</b>        | <b>YES</b>  | <b>NO</b> |  |
| Fever                                                                                    |             |           |  |
| Dry cough                                                                                |             |           |  |
| Shortness of breath                                                                      |             |           |  |
| Fatigue                                                                                  |             |           |  |
| Sore throat                                                                              |             |           |  |
| Headache                                                                                 |             |           |  |
| <b>Exposure awareness: How can I get COVID-19?</b>                                       | <b>YES</b>  | <b>NO</b> |  |
| From cough drops or sneezes                                                              |             |           |  |
| From contaminated surfaces                                                               |             |           |  |
| Air borne                                                                                |             |           |  |
| Eating wild meat                                                                         |             |           |  |
| Person to person                                                                         |             |           |  |
| From non-symptomatic person                                                              |             |           |  |
| <b>What is your Attitudes and challenge towards COVID-19?</b>                            | <b>YES</b>  | <b>NO</b> |  |
| COVID-19 is dangerous and can kill                                                       |             |           |  |
| I will adhere to all COVID-19 regulations set by government                              |             |           |  |
| I know how to protect myself from getting COVID-19                                       |             |           |  |
| If I got COVID-19 symptoms, I would be afraid of going to a treatment center             |             |           |  |
| I am ready to self-quarantine in case of contact with suspects                           |             |           |  |
| Anyone can get COVID-19                                                                  |             |           |  |
| I fear getting close to any former victim of COVID-19                                    |             |           |  |
| Staying at home is hard for me                                                           |             |           |  |
| Avoiding person to person contact is hard at home                                        |             |           |  |
| <b>How ready are you to fight COVID-19?</b>                                              | <b>YES</b>  | <b>NO</b> |  |
| I know the right sanitizers for Covid-19 while at university                             |             |           |  |
| I know when and how to wear masks while at university                                    |             |           |  |
| I will cover my mouth and nose when sneezing while at university                         |             |           |  |
| I know where to throw used tissue after sneezing while at university                     |             |           |  |
| I wash my hands with soap and water after sneezing while at university                   |             |           |  |
| I will observe social distancing of at least 2 meters while at university                |             |           |  |
| I will avoid crowds and social gatherings at university                                  |             |           |  |
| I will stay at my accommodation on weekends to avoid COVID-19 spread while at university |             |           |  |
| I will not shake hands or hug any one even at home while at university                   |             |           |  |
| I know risk communication contact for COVID-19                                           |             |           |  |

3

4
